# Supplementary material for: Genetic diversity and population divergence of Leonurus japonicus and its distribution dynamic changes from the last interglacial to the present in China
Source: PubMed Central journal article supplement (PMC10210291; doi:10.1186/s12870-023-04284-x), 2023-05-25

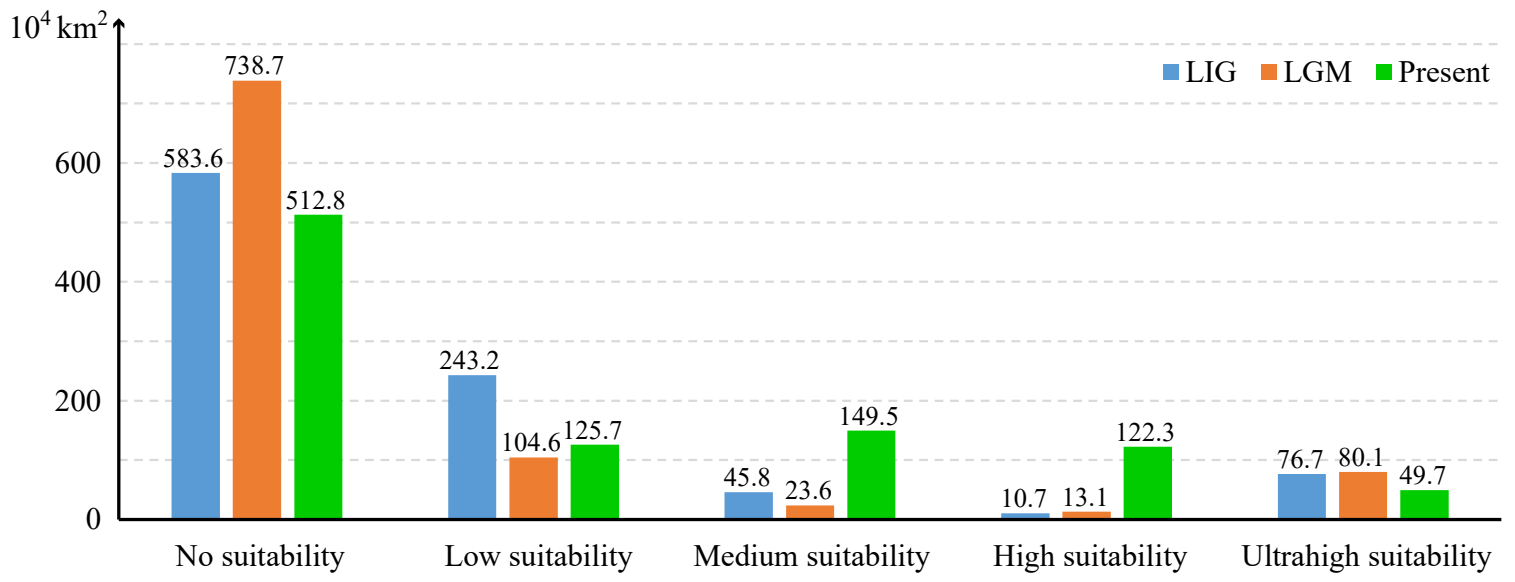

Supplement: 12870_2023_4284_MOESM6_ESM.pdf [file 12870_2023_4284_MOESM6_ESM.pdf]
