# Supplementary material for: Genetic diversity and population divergence of Leonurus japonicus and its distribution dynamic changes from the last interglacial to the present in China
Source: PubMed Central journal article supplement (PMC10210291; doi:10.1186/s12870-023-04284-x), 2023-05-25
Supplement: 12870_2023_4284_MOESM8_ESM.pdf [file 12870_2023_4284_MOESM8_ESM.pdf]

ML

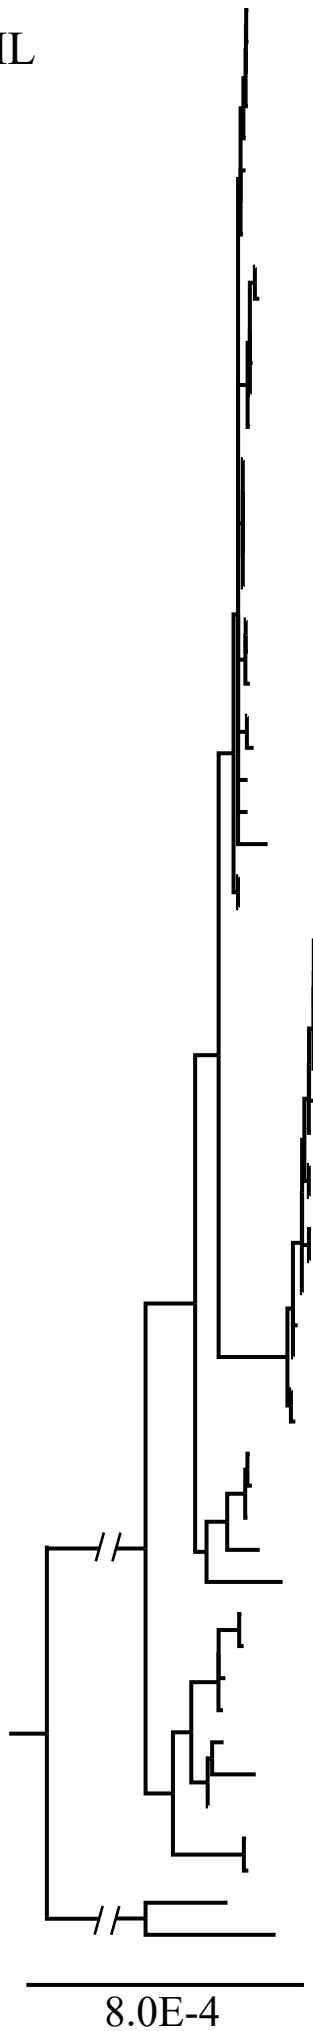

BI

Clade A

Clade B

Clade C

Clade D

Outgroup

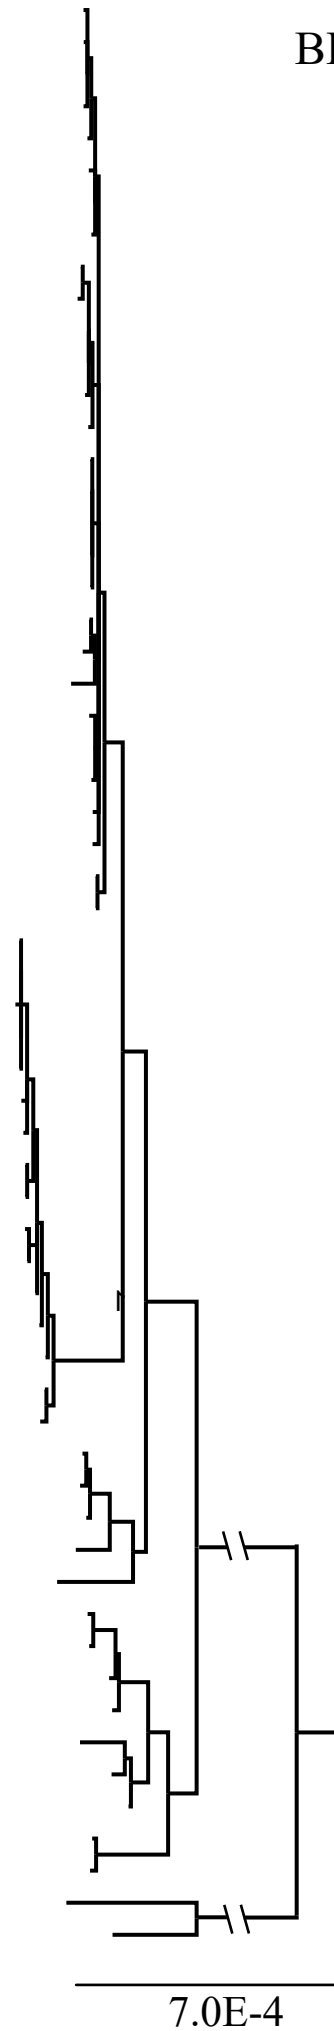

$8.0E-4$

$7.0E-4$
